# Supplementary material for: Tailored release of triiodothyronine and retinoic acid from a spatio-temporally fabricated nanofiber composite instigating neuronal differentiation
Source: Royal Society of Chemistry journal article supplement (doi:10.1039/c7nr05918c), 2017-01-01
Supplement: c7nr05918c1.pdf [file c7nr05918c1.pdf]

## Supporting Information

### **Tailored release of Triiodothyronine and Retinoic acid from spatio-temporally fabricated nanofibers instigating neuronal differentiation**

Aishwarya Satish <sup>a</sup>, Purna Sai Korrapati <sup>a,\*</sup>

<sup>a</sup> Biological Materials Laboratory, CSIR - Central Leather Research Institute, Chennai, India-600 020. e-mail: [purnasaik.clri@gmail.com](mailto:purnasaik.clri@gmail.com); Tel: +91-44-24437263; +91-44-24453491

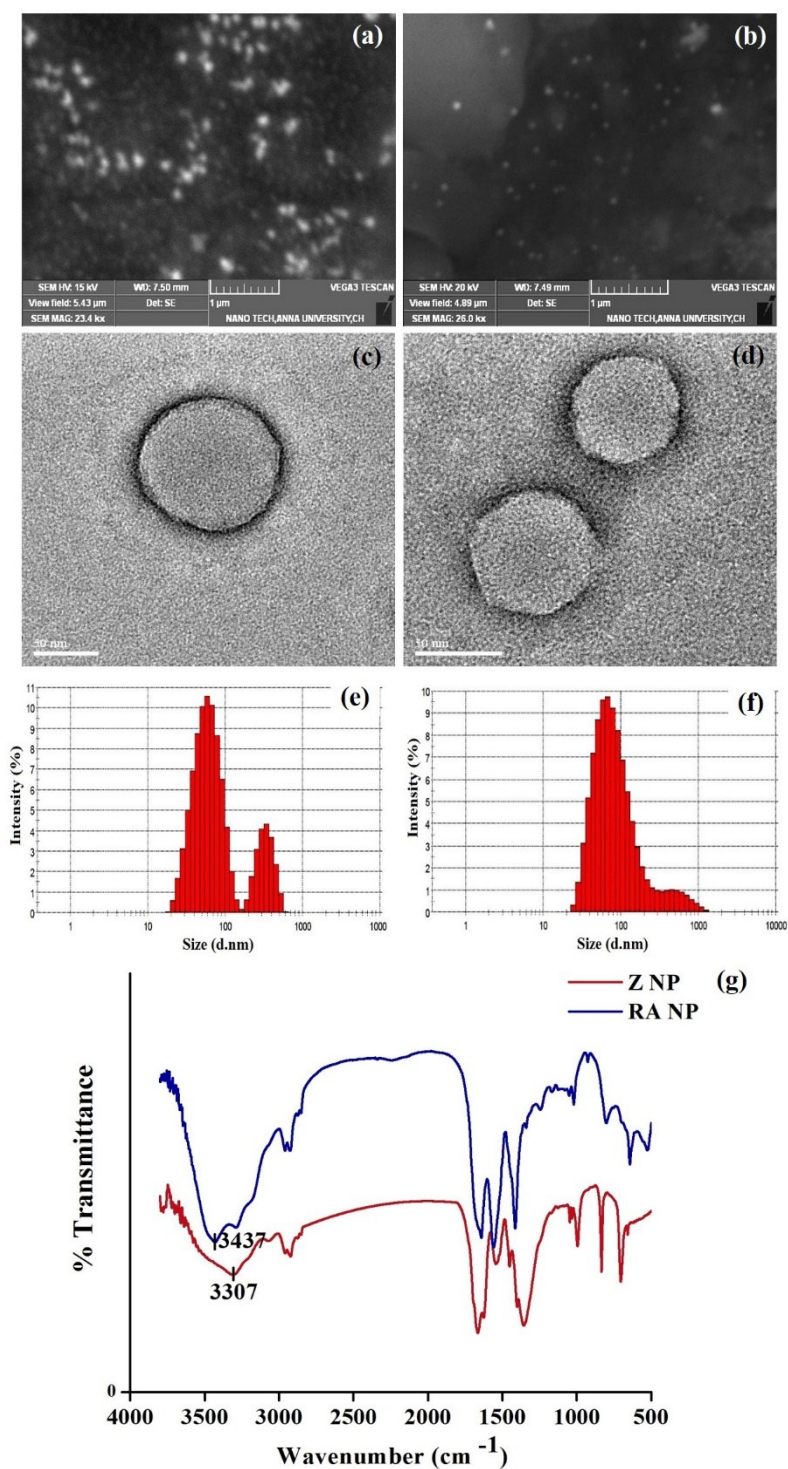

**Figure S1:** Scanning Electron Micrographs of (a) Hollow zein nanoparticles and (b) RA loaded hollow zein nanoparticles, Scale bar: 1  $\mu\text{m}$ . Transmission Electron Microscopic images of (c) Hollow zein nanoparticles and (d) RA loaded nanoparticles. Scale bar: 50 nm. Graphical representation of size distribution for (e) hollow zein nanoparticles and (f) RA loaded nanoparticles (g) FTIR spectra of hollow zein nanoparticles and RA loaded nanoparticles.

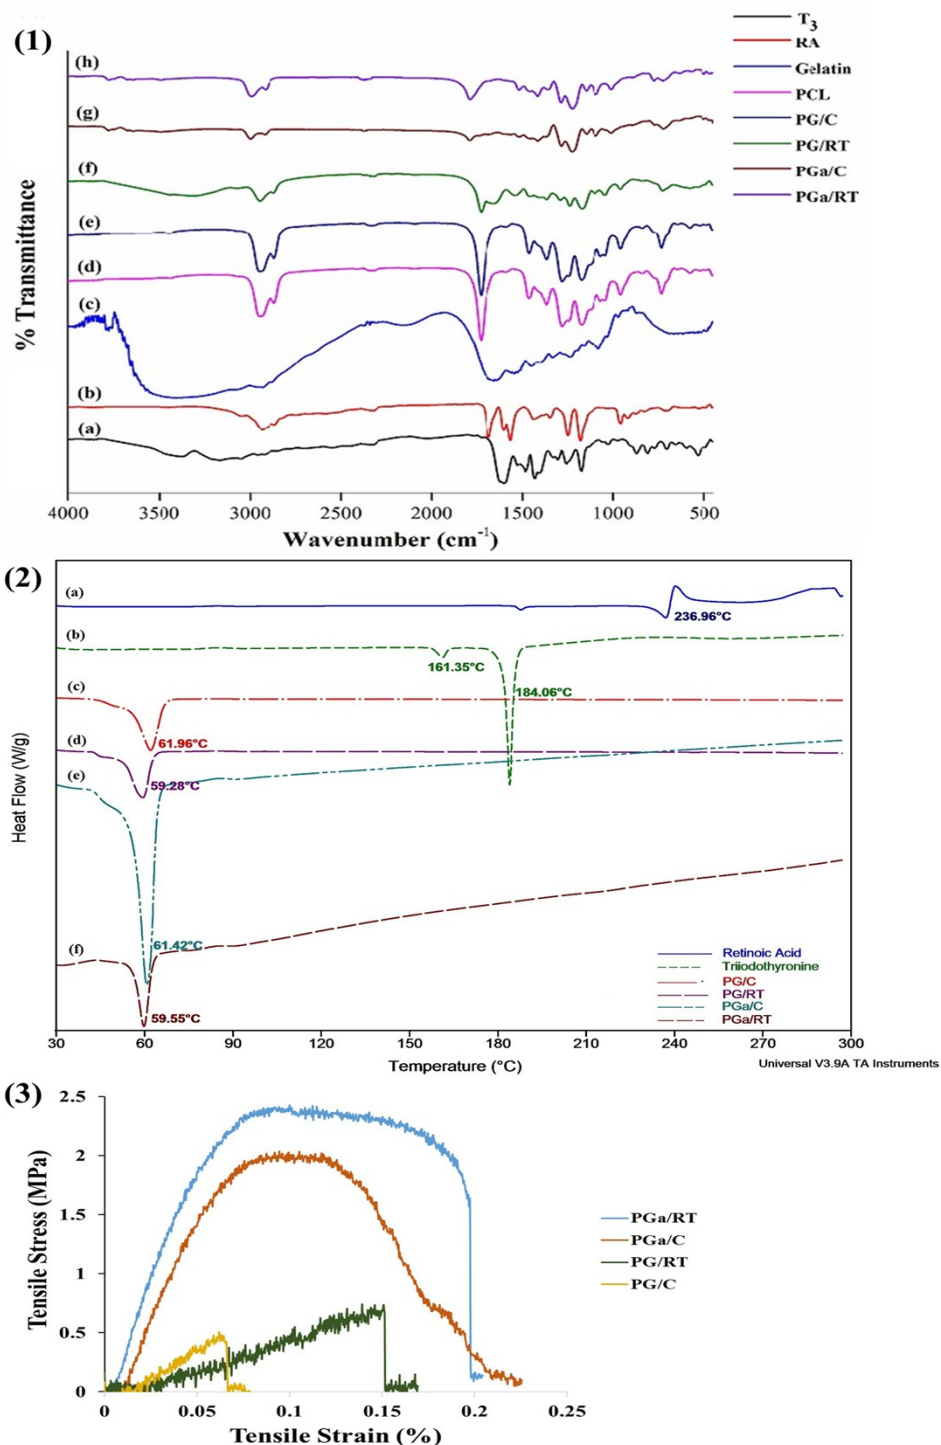

**Figure S2:** (1) FTIR spectra of (a)  $T_3$ , (b) RA, (c) Gelatin, (d) PCL, (e) PG/C nanofiber, (f) PG/RT nanofiber, (g) PGa/C nanofiber and (h) PGa/RT nanofiber. (2) Differential Scanning Thermograms of (a) retinoic acid, (b)  $T_3$ , (c) PG/C, (d) PG/RT, (e) PGa/C and (f) PGa/RT. (3) Stress - Strain curve of aligned (PGa/C, PGa/RT) and random (PG/C, PG/RT) nanofibers.

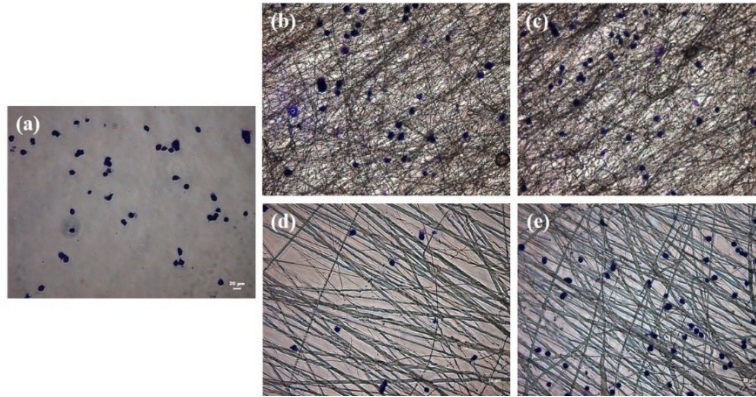

**Figure S3:** Phase contrast images of crystal violet stained N2A cells, adhered over (a) blank (tissue culture plate), (b) PG/C, (c) PG/RT, (d) PGa/C and (e) PGa/RT nanofibers, on 3 h incubation. Scale bar: 20  $\mu\text{m}$ .

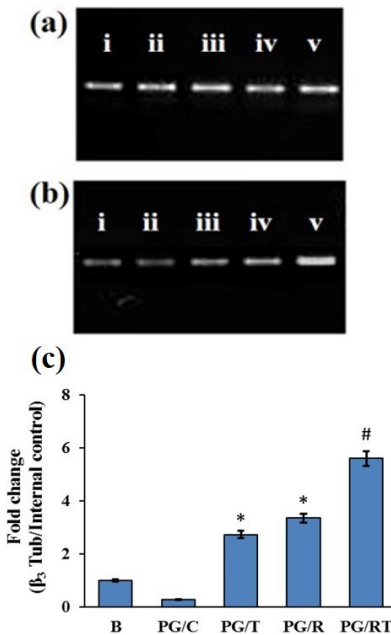

**Figure S4:** Gel electrophoresis image of gene expression of (a) GAPDH and (b)  $\beta$  III Tubulin of a 10 day N2A culture in (i) blank (ii) PG/C, (iii) PG/T, (iv) PG/R and (v) PG/RT nanofiber coated coverslips. (c) Graphical representation of  $\beta$  III Tubulin gene expression quantitated in real time PCR of a 10 day N2A culture in (i) blank (ii) PG/C, (iii) PG/T, (iv) PG/R and (v) PG/RT nanofiber coated coverslips. Each experiment was repeated thrice, each in triplicates, with GAPDH as the internal control. The P-value is indicated as \*  $P \leq 0.1$ , #  $P \leq 0.05$ .
